# Supplementary material
Source: PubMed Central journal article supplement (PMC3510541)
Supplement: MCB.00875-12_zmb999109761so1.pdf [file MCB.00875-12_zmb999109761so1.pdf]

# Regulation of the chaperone effects on a yeast prion by the cochaperone Sgt2

Denis A. Kiktev, Jesse C. Patterson, Susanne Müller, Bhawana Bariar, Tao Pan  
and Yury O. Chernoff<sup>#</sup>

School of Biology and Parker H. Petit Institute for Bioengineering & Bioscience, Georgia Institute  
of Technology, Atlanta, GA 30332

<sup>#</sup>Corresponding author.

## List of Supplementary materials

**Table S1.** Yeast strains constructed in this study

**Table S2.** Oligonucleotide primers used in this study

**FIG. S1.** Phenotypes of *get* deletions and comparisons to strains containing other aggregates

**FIG. S2.** Aggregation of the Get and Sgt2 proteins

Table S1. Yeast strains constructed in this study

| Name       | Genotypic background | Mating type | Genetic alteration                                                   | Prion composition                          |
|------------|----------------------|-------------|----------------------------------------------------------------------|--------------------------------------------|
| GT905      | 74-D694              | <i>MATa</i> | <i>get2-473</i>                                                      | [ <i>PSI<sup>+</sup> PIN<sup>+</sup></i> ] |
| GT982      | 74-D694              | <i>MATa</i> | <i>get2Δ::HIS3MX6</i>                                                | [ <i>PSI<sup>+</sup> PIN<sup>+</sup></i> ] |
| GT1300-2D  | GT81                 | <i>MATa</i> | <i>get3Δ::HIS3MX6</i>                                                | [ <i>PSI<sup>+</sup> PIN<sup>+</sup></i> ] |
| GT1301-8C  | GT81                 | <i>MATa</i> | <i>get2Δ::hphNT1</i>                                                 | [ <i>PSI<sup>+</sup> PIN<sup>+</sup></i> ] |
| GT1316-1B  | GT81                 | <i>MATa</i> | <i>get1Δ::HIS3MX6</i>                                                | [ <i>PSI<sup>+</sup> PIN<sup>+</sup></i> ] |
| GT1308     | GT81                 | <i>MATa</i> | <i>get4Δ::HIS3MX6</i>                                                | [ <i>PSI<sup>+</sup> PIN<sup>+</sup></i> ] |
| GT1309     | GT81                 | <i>MATa</i> | <i>get5Δ::HIS3MX6</i>                                                | [ <i>PSI<sup>+</sup> PIN<sup>+</sup></i> ] |
| GT1448     | GT81                 | <i>MATa</i> | <i>sgt2Δ::HIS3MX6</i>                                                | [ <i>PSI<sup>+</sup> PIN<sup>+</sup></i> ] |
| GT1450     | GT81                 | <i>MATa</i> | <i>sgt2Δ::kanMX6</i>                                                 | [ <i>PSI<sup>+</sup> PIN<sup>+</sup></i> ] |
| GT1468-14A | GT81                 | <i>MATa</i> | <i>get4Δ::HIS3MX6 sgt2Δ::kanMX6</i>                                  | [ <i>PSI<sup>+</sup> PIN<sup>+</sup></i> ] |
| GT1469-2B  | GT81                 | <i>MATa</i> | <i>get5Δ::HIS3MX6 sgt2Δ::kanMX6</i>                                  | [ <i>PSI<sup>+</sup> PIN<sup>+</sup></i> ] |
| GT1476-1A  | GT81                 | <i>MATa</i> | <i>get1Δ::HIS3MX6 sgt2Δ::kanMX6</i>                                  | [ <i>PSI<sup>+</sup> PIN<sup>+</sup></i> ] |
| GT1477-1C  | GT81                 | <i>MATa</i> | <i>get3Δ::HIS3MX6 sgt2Δ::kanMX6</i>                                  | [ <i>PSI<sup>+</sup> PIN<sup>+</sup></i> ] |
| GT1487-4A  | GT81                 | <i>MATa</i> | <i>get2Δ::hphNT1 sgt2Δ::HIS3MX6</i>                                  | [ <i>PSI<sup>+</sup> PIN<sup>+</sup></i> ] |
| GT1550     | GT81                 | <i>MATa</i> | <i>SGT2-HA::kanMX6</i>                                               | [ <i>PSI<sup>+</sup> PIN<sup>+</sup></i> ] |
| GT1585-2A  | GT81                 | <i>MATa</i> | <i>ssb1::HIS3 ssb2::ura3 get2::hphNT1</i>                            | [ <i>PSI<sup>+</sup> PIN<sup>+</sup></i> ] |
| GT1589-4A  | GT81                 | <i>MATa</i> | <i>SGT2-HA::kanMX6 get2::hphNT1</i>                                  | [ <i>PSI<sup>+</sup> PIN<sup>+</sup></i> ] |
| GT1624     | GT81                 | <i>MATa</i> | <i>SGT2-HA::kanMX6</i>                                               | [ <i>psi<sup>-</sup> pin<sup>-</sup></i> ] |
| GT1635     | GT81                 | <i>MATa</i> | <i>cpr7Δ::hphNT1</i>                                                 | [ <i>PSI<sup>+</sup> PIN<sup>+</sup></i> ] |
| GT1642     | GT81                 | <i>MATa</i> | <i>sti1Δ::kanMX6</i>                                                 | [ <i>PSI<sup>+</sup> PIN<sup>+</sup></i> ] |
| GT1651-1A  | GT81                 | <i>MATa</i> | <i>ubc4Δ::his3MX6 get2Δ::hphNT1</i>                                  | [ <i>PSI<sup>+</sup> PIN<sup>+</sup></i> ] |
| GT1657-2B  | GT81                 | <i>MATa</i> | <i>get2Δ::hphNT1 cpr7Δ::hphNT1</i>                                   | [ <i>PSI<sup>+</sup> PIN<sup>+</sup></i> ] |
| GT1670     | GT81                 | <i>MATa</i> | <i>get2Δ::hphNT1 sti1Δ::kanMX6</i>                                   | [ <i>PSI<sup>+</sup> PIN<sup>+</sup></i> ] |
| GT1719     | GT81                 | <i>MATa</i> | <i>get2Δ::HIS3MX6</i>                                                | [ <i>PSI<sup>+</sup> PIN<sup>+</sup></i> ] |
| GT1726-2A  | GT81                 | <i>MATa</i> | <i>get2Δ::HIS3MX6 sgt2Δ::HIS3MX6</i>                                 | [ <i>PSI<sup>+</sup> PIN<sup>+</sup></i> ] |
| GT1732     | GT81                 | <i>MATa</i> | <i>SGT2-HA::kanMX6</i>                                               | [ <i>psi<sup>-</sup> PIN<sup>+</sup></i> ] |
| GT1733     | GT81                 | <i>MATa</i> | <i>SGT2-HA::kanMX6 get2Δ::hphNT1</i>                                 | [ <i>psi<sup>-</sup> PIN<sup>+</sup></i> ] |
| GT1747-5A  | GT81                 | <i>MATa</i> | <i>get2Δ::HIS3MX6 sgt2Δ::kanMX6 GET4-GFP::HIS3MX</i>                 | [ <i>PSI<sup>+</sup> PIN<sup>+</sup></i> ] |
| GT1747-25C | GT81                 | <i>MATa</i> | <i>get2Δ::HIS3MX6 GET4-GFP::HIS3MX</i>                               | [ <i>PSI<sup>+</sup> PIN<sup>+</sup></i> ] |
| GT1748-6A  | GT81                 | <i>MATa</i> | <i>get2Δ::HIS3MX6 sgt2Δ::kanMX6 GET5-GFP::HIS3MX</i>                 | [ <i>PSI<sup>+</sup> PIN<sup>+</sup></i> ] |
| GT1748-6D  | GT81                 | <i>MATa</i> | <i>get2Δ::HIS3MX6 GET5-GFP::HIS3MX</i>                               | [ <i>PSI<sup>+</sup> PIN<sup>+</sup></i> ] |
| GT1929-1C  | GT81                 | <i>MATa</i> | <i>kanMX6::P<sub>GAL</sub>-GFP-SBH1</i>                              | [ <i>PSI<sup>+</sup> PIN<sup>+</sup></i> ] |
| GT1939-3D  | GT81                 | <i>MATa</i> | <i>sgt2Δ::HIS3MX6 kanMX6::P<sub>GAL</sub>-GFP-SBH1</i>               | [ <i>PSI<sup>+</sup> PIN<sup>+</sup></i> ] |
| GT1960     | GT81                 | <i>MATa</i> | <i>get2Δ::hphNT1 kanMX6::P<sub>GAL</sub>-GFP-SBH1</i>                | [ <i>PSI<sup>+</sup> PIN<sup>+</sup></i> ] |
| GT1961     | GT81                 | <i>MATa</i> | <i>get2Δ::hphNT1 sgt2Δ::HIS3MX6 kanMX6::P<sub>GAL</sub>-GFP-SBH1</i> | [ <i>PSI<sup>+</sup> PIN<sup>+</sup></i> ] |

## Designations:

*HIS3MX6* - *HIS5* gene of *Schizosaccharomyces pombe* (orthologous to *S. cerevisiae HIS3*)

*kanMX6*- bacterial gene that determines resistance to kanamycin in *E. coli* and G418 in yeast

*hphNT* - bacterial gene that confers resistance to hygromycin B

*HA* - hemagglutinin tag

*GFP* - green fluorescent protein

Table S2. Oligonucleotide primers used in this study

| Number | Sequence 5'-3'                                                         | Gene        | Direction | Application                 |
|--------|------------------------------------------------------------------------|-------------|-----------|-----------------------------|
| 457    | GCAATCCTGAACTACGTCTAGTTGATTGAAATAGGAGAACGGATCCC<br>CGGGTTAATTAA        | <i>GET1</i> | Forward   | Deletion                    |
| 458    | TACATAAACATATTATATATACGTACATAATGTAATAACAGAATTCGA<br>GCTCGTTTAAAC       | <i>GET1</i> | Reverse   | Deletion                    |
| 459    | AAACGTACGACAAGAACAAGAAGATCATCACATTGTAATTCGGATCCC<br>CGGGTTAATTAA       | <i>GET3</i> | Forward   | Deletion                    |
| 460    | TTATATGTCGTATGTATCTATTTATGGTATTCAGGGGCTTGAATTCGAG<br>CTCGTTTAAAC       | <i>GET3</i> | Reverse   | Deletion                    |
| 668    | TTTGCTGGGACAAAAGAACAAGAATAGGAACATGAAAAGATTTGAGA<br>ATTCGAGCTCGTTAAAGC  | <i>GET2</i> | Forward   | Deletion                    |
| 669    | GGAATAATGTCGGGTTATGAGAACAATGTATTATATTACTGAACTGCA<br>GGTCGACGGATCCCCGG  | <i>GET2</i> | Reverse   | Deletion                    |
| 678    | AACCAAGTAAACATCATAAAGGGACATAAATAATAACAAGCTCG<br>GATCCCCGGGTTAATTAA     | <i>GET4</i> | Forward   | Deletion                    |
| 679    | GCCACCGCAAACATATTTATCTATTCCTTCGCAAATATGCTCTTTGAAT<br>TCGAGCTCGTTTAAAC  | <i>GET4</i> | Reverse   | Deletion                    |
| 680    | CAGAGATAAACTAGCGAAGAATAAATAACTTTATACAAAATTAATCCGG<br>ATCCCCGGGTTAATTAA | <i>GET5</i> | Forward   | Deletion                    |
| 681    | CAACTGTGTAATAAACAAGTATGTACGTAATACTATACTAATCGAA<br>TTCGAGCTCGTTTAAAC    | <i>GET5</i> | Reverse   | Deletion                    |
| 684    | CACCAAGATCTTCACATTGTAATTATGG                                           | <i>GET3</i> | Forward   | Cloning                     |
| 685    | GGGGCCCGGTTTCCTTATCTTCTAACTC                                           | <i>GET3</i> | Reverse   | Cloning/tagging             |
| 739    | CTTCTGACCAAGTGATATCTTATTAATACAAATCTACTGTACGGGATC<br>CCCCGGTAAATTAA     | <i>SGT2</i> | Forward   | Deletion                    |
| 740    | TATCTACATAACATGTATTGCATTAAGGCTTATTTTCAGTCCAGAATTC<br>GAGCTCGTTTAAAC    | <i>SGT2</i> | Reverse   | Deletion                    |
| 751    | ACAAGGATCCTGTACGATGTCAGCATC                                            | <i>SGT2</i> | Forward   | Cloning                     |
| 752    | AGTGAGCTCCGAAAATCGACG                                                  | <i>SGT2</i> | Reverse   | Cloning                     |
| 753    | TTCAGTCCCGGTTGCTTGTCTCATTGTC                                           | <i>SGT2</i> | Reverse   | Cloning/tagging             |
| 766    | TAAGGATCCTACTGTACGATGTCAGCATC                                          | <i>SGT2</i> | Forward   | Cloning                     |
| 767    | ATGCTCGAGATTAAGGCTTATTTTCAGTCC                                         | <i>SGT2</i> | Reverse   | Cloning                     |
| 876    | TCAGCCCGGATTGCTTGTCTGTTCTCATTGTC                                       | <i>SGT2</i> | Reverse   | Cloning                     |
| 900    | TCTGAAAGGTGTTCCGCAGCAACAACCTACATCCAACCGGAATTCGA<br>GCTCGTTAAAGC        | <i>CPR7</i> | Forward   | Deletion                    |
| 901    | GGGTTATTTAATCTCAAATTTTCAGCCTTACAAGTAACTAAGCAGGTCG<br>ACGGATCCCCGG      | <i>CPR7</i> | Reverse   | Deletion                    |
| 909    | AAGCCCAAAAGTCTGCTCCC                                                   | <i>STII</i> | Forward   | Deletion                    |
| 910    | ATCTTCAAGTCCGATTTCTC                                                   | <i>STII</i> | Reverse   | Deletion                    |
| 938    | CCTACAAGACATGATGTCGGGATTCTGGGCGGATCGAAGCGGATCCC<br>CGGGTTAATTAA        | <i>GET4</i> | Forward   | Tagging                     |
| 939    | GCACATACATATATATGTATATACGTATGGTCGTCAAGCGAATTCGA<br>GCTCGTTTAAAC        | <i>GET4</i> | Reverse   | Tagging                     |
| 940    | AGTCATGGAGCGTATACAAAAGGCTGGTCTCTGGCCAAACGGATCCC<br>CGGGTTAATTAA        | <i>GET5</i> | Forward   | Tagging                     |
| 941    | CGCCAAAGGAAAGAAGAAATAGTAAGCGCAACCGTGATGAATTCGA<br>GCTCGTTTAAAC         | <i>GET5</i> | Reverse   | Tagging                     |
| 1042   | AAAGGATCCAAATGGCTGAGGACTGAAAATGC                                       | <i>SGT2</i> | Forward   | Cloning of the<br>MC region |
| 1044   | GATCCCGGGATTGCTCAACCTTCTTCTTGGC                                        | <i>SGT2</i> | Reverse   | Cloning of the<br>NM region |
| 1045   | CCACTCGAGACTATTGCTCAACCTTCTTCTTGGC                                     | <i>SGT2</i> | Reverse   | Cloning of the<br>NM region |
| 1057   | AAGGGATCCTTATGCAATCTTTGAATCTGGAGAAAACC                                 | <i>SGT2</i> | Forward   | Cloning of the<br>C region  |
| 1065   | CTCTTCCATGTTTGTAGCATCAGCAACGTAGCTCTAGGAACGGATCCCC<br>GGGTTAATTAA       | <i>GET2</i> | Forward   | Deletion                    |
| 1066   | CCTGAAAAGAAAAGCCGGGAATAATGTCGGGTTATGAGAACGAATTCG<br>AGCTCGTTTAAAC      | <i>GET2</i> | Reverse   | Deletion                    |

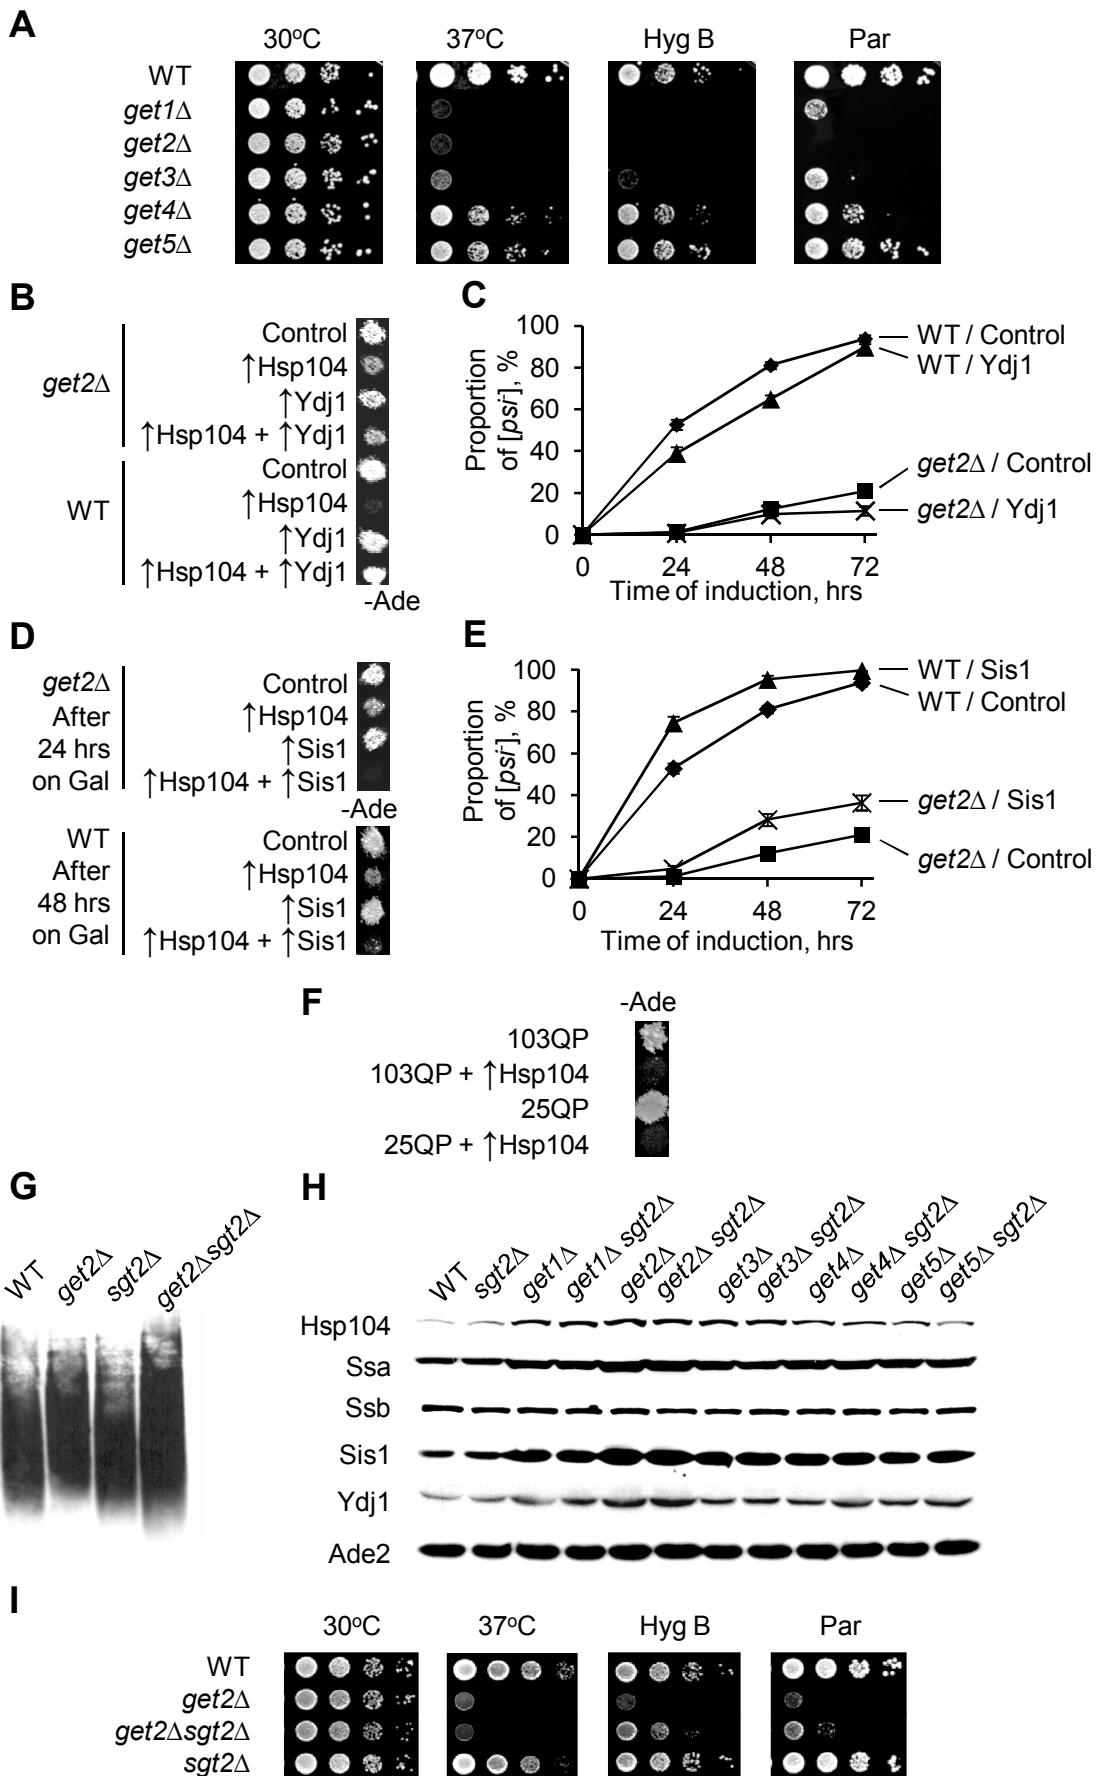

**FIG. S1. Phenotypes of *get* deletions and comparisons to strains containing other aggregates.** (A) *Get* deletions cause sensitivity to high temperature and to translational antibiotics hygromycin B and paromomycin. Decimal serial dilutions of mid-exponential cultures, grown in YPD, were spotted either onto YPD plates incubated at different temperatures, as specified, or onto YPD plates supplemented with either 40  $\mu\text{g/ml}$  of hygromycin B (Hyg B) or 600  $\mu\text{g/ml}$  of paromomycin (Par), as indicated, and incubated for 2 days at 30°C. (B) and (C) Extra copy of the *YDJI* gene under its endogenous promoter decreases [*PSI*<sup>+</sup>] curing in the wild-type (WT) strain but has little to no effect on the *get2* $\Delta$  strain, as detected in the plate assay (B) after 48 hrs of induction, and in the liquid assay (C). (D) and (E) Extra copy of the *SIS1* gene under its endogenous promoter slightly increases [*PSI*<sup>+</sup>] curing in both wild-type and *get2* $\Delta$  strains in both plate (D) and liquid (E) assays. On panel D, *HSP104* was induced for 24 hrs in the wild type strain but for 48 hrs in the *get2* $\Delta$  strain, in order to minimize the impact of the *get2* $\Delta$ -mediated differences in the efficiency of [*PSI*<sup>+</sup>] curing. In both (C) and (E), cultures were grown in liquid medium (selective for plasmids) with raffinose and galactose to induce *P<sub>GAL</sub>-HSP104*. Aliquots were taken and plated onto plasmid-selective medium after specified periods of time. Presence or absence of [*PSI*<sup>+</sup>] was detected after replica-plating to -Ade medium. At least three experiments were performed for each culture; standard deviations are shown by error bars. WT refers to wild-type, Control to an empty vector. (F) Strains expressing 103QP (fused to GFP) do not exhibit a defect of [*PSI*<sup>+</sup>] curing by excess Hsp104, in contrast to *get2* $\Delta$  strains. 25QP (fused to GFP) was used as a non-aggregating control. All constructs were under *P<sub>GAL</sub>* promoter. Image was taken after 4 days of incubation on -Ade, following three days of incubation on galactose medium. Experiment was performed in the conditions selective for 103QP (or 25QP) and *HSP104* (or control) plasmids. (G) *Get2* deletion slightly increases an average size of Sup35 polymers, that is ameliorated by *sgt2* $\Delta$ . Sup35 polymers in the [*PSI*<sup>+</sup>] extracts were fractionated by SDD-AGE and detected by Western blotting. (H) Hsps levels in the cells lacking any of the *Get* proteins are increased, as detected by Western blotting. Ade2 protein was used as a loading control. (I) Temperature sensitivity of the *get2* $\Delta$  strain is not reversed by *sgt2* $\Delta$ , while sensitivities to hygromycin B and paromomycin are reversed by *sgt2* $\Delta$ . Decimal serial dilutions of mid-exponential cultures, grown in YPD, were spotted either onto YPD plates incubated at different temperatures as specified, or onto YPD plates supplemented with antibiotics as indicated on panel A (incubated at 30°C). Plate images were taken after 2 days.

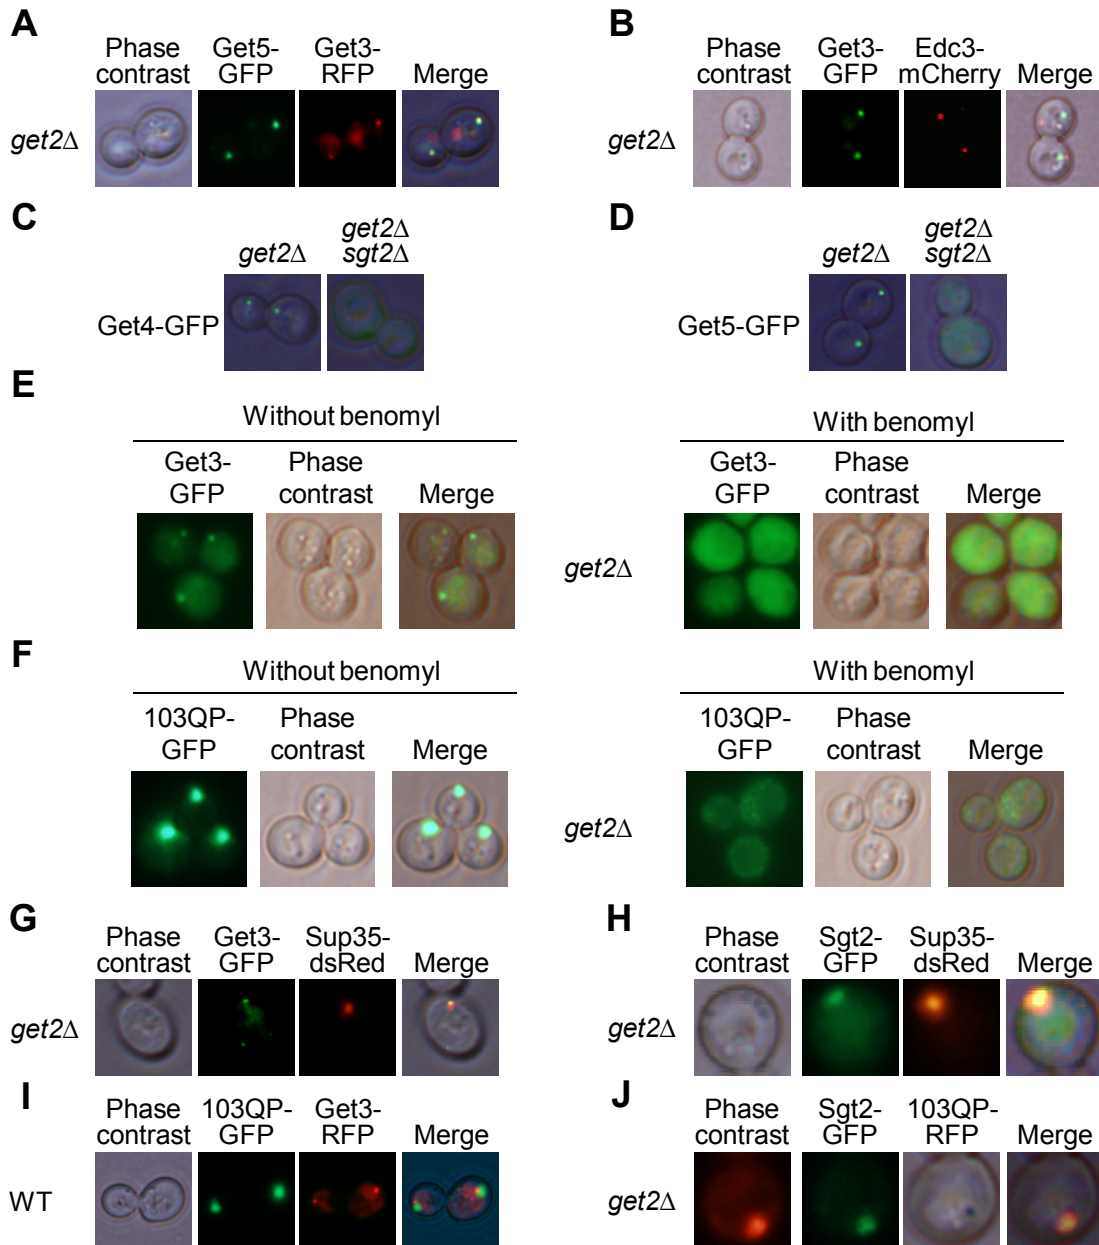

**FIG. S2. Aggregation of the Get and Sgt2 proteins.** (A) Get3 (tagged by RFP) and Get5 (tagged by GFP) are colocalized to the same aggregates in the *get2Δ* strain. (B) Get/TA aggregates, marked by Get3, do not colocalize with the P-body marker Edc3. (C) and (D) *Sgt2Δ* abolishes aggregation of cytosolic Get4 (C) and Get5 (D) proteins, tagged by GFP, in the *get2Δ* strains. (E) and (F) Formation of Get3-GFP foci in the *get2Δ* strain (E) is abolished upon addition of 10  $\mu$ g/ml of benomyl. Formation of 103QP-GFP deposits, which is known to be inhibited by benomyl (see Wang *et al.* 2009 FASEB J **23**:451-63, ref. 67), is shown as a control in the same strain (F). Images were taken at 8 hours after the induction of tagged constructs and (where indicated) addition of benomyl. (G) Aggregates of Sup35 (marked with Sup35NM-dsRed) are colocalized with Get/TA aggregates (marked with Get3-GFP) in 15% of *get2Δ* [*PSI*<sup>+</sup>] cells containing both types of aggregates. (H) Aggregates of Sup35 (marked with Sup35NM-dsRed) are colocalized with Sgt2-GFP in 12% of *get2Δ* [*PSI*<sup>+</sup>] cells containing both types of aggregates. (I) About 8% of Get<sup>+</sup> cells bearing clumps of the GFP-tagged 103QP also contain foci of the RFP labeled Get3, which are overlapping with or juxtaposed to 103QP clumps in about 80% of the cases. (J) Foci of the GFP-labeled Sgt2 overlap with or are juxtaposed to the clumps of RFP-tagged 103QP in 12% of the cells bearing both types of aggregates in the *get2Δ* strain.
